# Supplementary material for: Genetic Diversity of Dengue Vector Aedes albopictus Collected from South Korea, Japan, and Laos
Source: MDPI journal article supplement (doi:10.3390/insects14030297), 2023-03-20
Supplement: s1 [file s1]

**Table S1** Microsatellite information used in the study of *Ae. albopictus*.

| Locus      | GenBank accession number | Primer sequence (5'-3')                                | Fluorescent dyes | Size range (bp) | References |
|------------|--------------------------|--------------------------------------------------------|------------------|-----------------|------------|
| AealbB51   | DQ366023                 | F:TCCACGTGGTATAACTCTGA<br>R: GTAGTTGTCCAATTAACATCG     | NED              | 141             | [43]       |
| AealbB52   | DQ366024                 | F:GGGTCTAGAAGTAATAGCGATG<br>R: GCATTCTTTGCTTCTGTTTGC   | FAM              | 173             | [43]       |
| AealbF3    | DQ366027                 | F:CTCGTGAGTACGTTCCGTGA<br>R: AGGGAAACAAGGACTTTCATCA    | VIC              | 247             | [43]       |
| AealbD2    | DQ366021                 | F:GAATCCCACACAGCGTCTTT<br>R: GGTCGCTTGACACCTTGAAT      | VIC              | 238             | [43]       |
| Alb-di-4   | KF146971                 | F:TGGCGACCTATTATACCCGC<br>R: CAACTCGTTCCTTGACCGTG      | FAM              | 166-200/179     | [41]       |
| Alb-di-6   | KF146972                 | F:TCTTCATCTACGCTGTGCTC<br>R: GACGCCAATCCGACAAAGTC      | PET              | 268-290/255     | [41]       |
| Alb-tri-3  | KF146973                 | F:AGATGTGTCGCAATGCTTCC<br>R: GATTCCGGTGATGTTGAGGCC     | NED              | 123-153/117     | [41]       |
| Alb-tri-18 | KF146975                 | F:ACACAATTGCCGTTTCAGCTC<br>R: CGTCTAATAGCTCCGGTCCC     | VIC              | 250-280         | [41]       |
| Alb-tri-20 | KF146976                 | F:GTGCCGTTGATCATCTGTCTC<br>R: TCCAGACCGTGAGTAATCC      | FAM              | 165-201         | [41]       |
| Alb-tri-25 | KF146978                 | F:CCAACCAACAACCCAGGAAC<br>R: TACGATGCGCAACCATCATC      | PET              | 257-278         | [41]       |
| Alb-tri-41 | KF146980                 | F:GATCGATTTGGGAGCTTCTG<br>R: GAACCTCTTCTCGTTGGCT       | NED              | 134-155         | [41]       |
| Alb-tri-45 | KF146982                 | F:TTTCAGCTCCGGTGTTATGGC<br>R: TGATGTTGATGATGATGACTACGA | NED              | 120-150         | [41]       |
| Alb-tri-46 | KF146983                 | F:TTCACAACATACGGAATCGC<br>R: GGTCCGGTGTATAGCCTTC       | FAM              | 158-192         | [41]       |
| Aealbmic8  | KP859598                 | F: TTGTTGTTCGGTTGTGTTTG<br>R: CGGGTTCCAACATATGTACGA    | PET              | 453-468         | [42]       |
| Aealbmic21 | KP859611                 | F: CCCTACAGCCCTGATTGAGA<br>R: CGAGTTGGGATGTGTGATTG     | VIC              | 212-232         | [42]       |
| Aealbmic23 | KP859613                 | F: AACGGAGCGGAGTCGATTAT<br>R: CTACTACCGCTGCCTTCTG      | PET              | 331-354         | [42]       |

**Table S2** Haplotype distribution and GenBank accession number of *Ae. albopictus* used in this study

[illegible]

| Locality name    | COI               | ND5               |
|------------------|-------------------|-------------------|
| Wonju (2017)     | MW526509-MW526526 | MW526720-MW526737 |
| Wonju (2020)     | MW526527-MW526544 | MW526738-MW526755 |
| Yeoncheon        | MW526545-MW526549 | MW526756-MW526760 |
| Yangsan          | MW526550-MW526561 | MW526761-MW526772 |
| Anyang (2020)    | MW526562-MW526565 | MW526773-MW526776 |
| Anyang (2018)    | MW526566-MW526569 | MW526777-MW526780 |
| Chuncheon        | MW526570-MW526576 | MW526781-MW526787 |
| Cheongyang       | MW526577-MW526578 | MW526788-MW526789 |
| Daejeon          | MW526579-MW526586 | MW526790-MW526797 |
| Gwacheon         | MW526587-MW526593 | MW526798-MW526804 |
| Geoje            | MW526594-MW526598 | MW526805-MW526809 |
| Gwangju          | MW526599-MW526600 | MW526810-MW526811 |
| Gyeongju         | MW526601-MW526602 | MW526812-MW526813 |
| Jeung-do         | MW526603-MW526607 | MW526814-MW526818 |
| Jeonju           | MW526608-MW526635 | MW526819-MW526846 |
| Sokcho           | MW526636-MW526648 | MW526847-MW526859 |
| Seoul            | MW526649-MW526651 | MW526860-MW526862 |
| Yeoju            | MW526652-MW526654 | MW526863-MW526865 |
| Yeosu            | MW526655-MW526656 | MW526866-MW526867 |
| Tokyo Japan,     | MW526657-MW526691 | MW526868-MW526902 |
| Vientiane, Laos, | MW526692-MW526719 | MW526903-MW526930 |

Abbreviations: WJ-I= Wonju (2017), WJ-II= Wonju (2020), YC= Yeoncheon, YS= Yangsan, AY-I= Anyang (2018), AY-II= Anyang (2020), CC= Chuncheon, CY= Cheongyang, DJ= Daejeon, GC= Gwacheon, GJ= Geoje, GW= Gwangju, GY= Gyeongju, JD= Jeungdo, JJ= Jeonju, SC= Sokcho, SE= Seoul, YJ= Yeoju, YE= Yeosu, TJ= Tokyo, Japan, VL= Vientiane, Laos

**Table S3** Pairwise differentiation ( $F_{ST}$ ) for concatenated sequences of the mitochondrial DNA among populations of *Ae. albopictus*.

| Locality name   | Locality ID | WJ-I         | WJ-II        | YC           | YS           | AY-I         | AY-II        | CC           | CY           | DJ           | GC           | GJ           | GW           | GY           | JD           | JJ           | SC           | SE           | YJ           | YE           | TJ           | VL |
|-----------------|-------------|--------------|--------------|--------------|--------------|--------------|--------------|--------------|--------------|--------------|--------------|--------------|--------------|--------------|--------------|--------------|--------------|--------------|--------------|--------------|--------------|----|
| Wonju (2017)    | WJ-I        | -            |              |              |              |              |              |              |              |              |              |              |              |              |              |              |              |              |              |              |              |    |
| Wonju (2020)    | WJ-II       | 0.009        | -            |              |              |              |              |              |              |              |              |              |              |              |              |              |              |              |              |              |              |    |
| Yeoncheon       | YC          | -            | -            | -            |              |              |              |              |              |              |              |              |              |              |              |              |              |              |              |              |              |    |
| Yangsan         | YS          | 0.051        | 0.103        | -            | -            |              |              |              |              |              |              |              |              |              |              |              |              |              |              |              |              |    |
| Anyang (2020)   | AY-I        | 0.043        | <b>0.103</b> | 0.022        | -            | -            |              |              |              |              |              |              |              |              |              |              |              |              |              |              |              |    |
| Anyang (2018)   | AY-II       | 0.005        | 0.045        | 0.063        | 0.031        | -            | -            |              |              |              |              |              |              |              |              |              |              |              |              |              |              |    |
| Chuncheon       | CC          | <b>0.288</b> | <b>0.375</b> | 0.159        | 0.216        | 0.083        | -            | <b>0.252</b> | -            |              |              |              |              |              |              |              |              |              |              |              |              |    |
| Cheongyang      | CY          | -            | -            | 0.000        | 0.068        | 0.152        | -            | -            | -            |              |              |              |              |              |              |              |              |              |              |              |              |    |
| Daejeon         | DJ          | 0.013        | 0.066        | -            | -            | -            | -            | 0.000        | -            | -            |              |              |              |              |              |              |              |              |              |              |              |    |
| Gwacheon        | GC          | 0.266        | 0.330        | -            | 0.191        | 0.263        | 0.160        | <b>0.288</b> | 0.000        | 0.000        | -            |              |              |              |              |              |              |              |              |              |              |    |
| Geoje           | GJ          | 0.000        | -            | 0.000        | 0.085        | 0.186        | <b>0.288</b> | -            | -            | -            | 0.020        | -            |              |              |              |              |              |              |              |              |              |    |
| Gwangju         | GW          | 0.027        | 0.027        | -            | 0.071        | -            | 0.183        | 0.000        | -            | -            | -            | -            | 0.020        | -            |              |              |              |              |              |              |              |    |
| Gyeongju        | GY          | -            | -            | 0.055        | 0.008        | -            | -            | 0.313        | -            | -            | -            | -            | -            | -            | 0.313        | <b>0.893</b> | -            |              |              |              |              |    |
| Jeung-do        | JD          | <b>0.854</b> | <b>0.915</b> | <b>0.932</b> | <b>0.805</b> | <b>0.880</b> | <b>0.719</b> | <b>0.945</b> | <b>0.893</b> | <b>0.950</b> | <b>0.876</b> | -            |              |              |              |              |              |              |              |              |              |    |
| Jeonju          | JJ          | -            | -            | 0.000        | -            | -            | -            | 0.000        | 0.000        | 0.000        | <b>0.893</b> | -            |              |              |              |              |              |              |              |              |              |    |
| Sokcho          | SC          | 0.266        | 0.330        | -            | 0.191        | 0.263        | 0.160        | 0.000        | 0.000        | 0.000        | 0.313        | 0.766        | 0.000        | -            | -            | -            | -            |              |              |              |              |    |
| Seoul           | SE          | 0.297        | 0.565        | 0.474        | 0.280        | 0.258        | 0.043        | 0.588        | 0.000        | 0.628        | 0.351        | 0.766        | 0.000        | -            | 0.157        | -            | -            | -            |              |              |              |    |
| Yeosu           | YE          | 0.159        | <b>0.246</b> | 0.167        | <b>0.140</b> | 0.098        | 0.146        | <b>0.247</b> | -0.111       | <b>0.279</b> | 0.133        | <b>0.826</b> | -            | 0.737        | <b>0.405</b> | -            | -            | -            | -            |              |              |    |
| Yeoju           | YJ          | <b>0.080</b> | 0.009        | -            | <b>0.210</b> | 0.181        | <b>0.530</b> | -            | -            | -            | 0.097        | <b>0.954</b> | -            | 0.737        | <b>0.405</b> | -            | -            | -            | -            | -            |              |    |
|                 |             | -            | -            | 0.108        | 0.072        | 0.049        | <b>0.329</b> | 0.055        | -            | -            | 0.023        | <b>0.915</b> | -0.38        | 0.544        | <b>0.232</b> | 0.018        | -            | -            | -            | -            |              |    |
|                 |             | 0.008        | 0.028        | 0.096        | 0.023        | 0.014        | 0.019        | 0.300        | -            | 0.342        | 0.017        | <b>0.868</b> | -            | 0.152        | 0.077        | 0.311        | 0.121        | -            | -            | -            |              |    |
|                 |             | 0.024        | 0.117        | 0.189        | 0.023        | 0.014        | 0.019        | 0.300        | -            | 0.342        | 0.017        | <b>0.868</b> | -            | 0.152        | 0.077        | 0.311        | 0.121        | -            | -            | -            |              |    |
|                 |             | -            | -            | -            | 0.070        | 0.091        | -            | -            | 0.004        | 0.000        | 0.000        | -            | 0.167        | <b>0.910</b> | 0.000        | 0.250        | 0.032        | -            | 0.198        | -            | 0.191        | -  |
|                 |             | 0.140        | 0.195        | 0.000        | -            | -            | -            | -            | 0.000        | 0.000        | 0.000        | -            | 0.167        | <b>0.910</b> | 0.000        | 0.250        | 0.032        | -            | 0.198        | -            | 0.191        | -  |
|                 |             | -            | -            | 0.000        | -            | -            | -            | -            | 0.000        | 0.000        | 0.000        | -            | 0.167        | <b>0.910</b> | 0.000        | 0.250        | 0.032        | -            | 0.198        | -            | 0.191        | -  |
| JAPAN, Tokyo    | TJ          | 0.266        | 0.330        | 0.000        | 0.191        | 0.263        | 0.160        | 0.000        | 0.000        | 0.000        | -            | 0.313        | <b>0.893</b> | 0.000        | 0.000        | -0.111       | -            | -            | -            | -            | 0.000        | -  |
| LAOS, Vientiane | VL          | <b>0.633</b> | <b>0.680</b> | <b>0.662</b> | <b>0.617</b> | <b>0.649</b> | <b>0.660</b> | <b>0.677</b> | <b>0.622</b> | <b>0.684</b> | <b>0.648</b> | <b>0.847</b> | <b>0.622</b> | <b>0.498</b> | <b>0.560</b> | <b>0.733</b> | <b>0.675</b> | <b>0.649</b> | <b>0.641</b> | <b>0.622</b> | -            | -  |
|                 |             | <b>0.695</b> | <b>0.729</b> | <b>0.688</b> | <b>0.668</b> | <b>0.672</b> | <b>0.665</b> | <b>0.704</b> | <b>0.646</b> | <b>0.711</b> | <b>0.682</b> | <b>0.810</b> | <b>0.646</b> | <b>0.551</b> | <b>0.631</b> | <b>0.778</b> | <b>0.717</b> | <b>0.666</b> | <b>0.665</b> | <b>0.646</b> | <b>0.583</b> | -  |

Abbreviations: WJ-I= Wonju (2017), WJ-II= Wonju (2020), YC= Yeoncheon, YS= Yangsan, AY-I= Anyang (2018), AY-II= Anyang (2020), CC= Chuncheon, CY= Cheongyang, DJ= Daejeon, GC= Gwacheon, GJ= Geoje, GW= Gwangju, GY= Gyeongju, JD= Jeungdo, JJ= Jeonju, SC= Sokcho, SE= Seoul, YJ= Yeoju, YE= Yeosu, TJ= Tokyo, Japan, VL= Vientiane, Laos

**Table S4** Analysis of Molecular Variance (AMOVA) by dividing Korea into A: north-south, B: east-west, C: five provincial units with concatenated sequences of mitochondrial DNA.

A: north-south

| Source of variation             | df  | Sum of squares | Variance components | Percentage of variation (%) | F-index*       |
|---------------------------------|-----|----------------|---------------------|-----------------------------|----------------|
| Among groups                    | 1   | 1.384          | -0.02047            | -4.99                       | -0.04993       |
| Among populations within groups | 17  | 26.325         | 0.18474             | 45.07                       | <b>0.42923</b> |
| Within populations              | 129 | 31.689         | 0.24565             | 59.93                       | <b>0.40074</b> |
| Total                           | 147 | 59.399         | 0.40992             |                             |                |

NB: North-South: North; WJ-I, WJ-II, YC, AY-I, AY-II, CC, GC, SC, SE, YJ, South; YS, CY, DJ, GJ, GW, GY, JD, JJ, YE

B: east-west

| Source of variation | df | Sum of squares | Variance components | Variation (%) | F-index* |
|---------------------|----|----------------|---------------------|---------------|----------|
| Among groups        | 1  | 1.406          | -0.01871            | -4.55         | -0.04554 |

|                                 |     |        |         |       |                |
|---------------------------------|-----|--------|---------|-------|----------------|
| Among populations within groups | 17  | 26.304 | 0.18390 | 44.76 | <b>0.42812</b> |
| Within populations              | 129 | 31.689 | 0.24565 | 59.79 | <b>0.40207</b> |
| Total                           | 147 | 59.399 | 0.41084 |       |                |

C: five provincial units

'df', degrees of freedom. \*Significant values ( $P < 0.05$ ) are with boldface after Bonferroni correction

**Table S5** Microsatellite genetic diversity in the 19 populations of *Ae. albopictus*.

N, Number of individuals;  $N_a$ , Number of alleles;  $A_R$ , Allelic range;  $H_o$ , observed heterozygosity;  $H_E$ , Expected heterozygosity;  $r$ , Allele richness;  $F_{IS}$ , Inbreeding Coefficient;  $N_p$ , Number of private alleles HWE, Hardy–Weinberg equilibrium; \*Significance of deviation from Hardy–Weinberg equilibrium at  $P < 0.001$  for loci in HWE after Bonferroni correction Abbreviations: WJ-I= Wonju (2017), WJ-II= Wonju (2020), YC= Yeoncheon, YS= Yangsan, AY-I= Anyang (2018), AY-II= Anyang (2020), CC= Chunchong, CY= Cheongyang, DJ= Daejeon, GC= Gwacheon, GJ= Geje, GW= Gwangju, GY= Gyeongju, JD= Jeongju, JJ= Jeonju, SC= Sokcho, SE= Seoul, YJ= Yeosu, YE= Yeosu, TJ= Tokyo, Japan, VL= Vientiane, Laos

**Table S6** Pairwise  $F_{ST}$  estimates and pairwise  $R_{ST}$  estimates for *Ae. albopictus* populations.

|       | TJ    | AY-I   | DJ    | GJ    | JD    | CC    | JJ    | WJ-I  | WJ-II | YC    | YS    | YE    | YJ    | SE     | GC    | GY    | CY    | SC    | VL    |
|-------|-------|--------|-------|-------|-------|-------|-------|-------|-------|-------|-------|-------|-------|--------|-------|-------|-------|-------|-------|
| TJ    | -     | 0.146  | 0.167 | 0.292 | 0.122 | 0.202 | 0.154 | 0.181 | 0.190 | 0.359 | 0.275 | 0.282 | 0.247 | 0.187  | 0.157 | 0.192 | 0.244 | 0.156 | 0.199 |
| AY-I  | 0.153 | -      | 0.200 | 0.360 | 0.158 | 0.238 | 0.179 | 0.263 | 0.265 | 0.438 | 0.355 | 0.381 | 0.300 | 0.207  | 0.210 | 0.222 | 0.304 | 0.187 | 0.242 |
| DJ    | 0.539 | 0.457  | -     | 0.230 | 0.201 | 0.175 | 0.175 | 0.210 | 0.211 | 0.287 | 0.258 | 0.288 | 0.267 | 0.194  | 0.210 | 0.235 | 0.241 | 0.222 | 0.182 |
| GJ    | 0.678 | 0.616  | 0.185 | -     | 0.351 | 0.278 | 0.279 | 0.260 | 0.313 | 0.421 | 0.366 | 0.399 | 0.395 | 0.356  | 0.287 | 0.336 | 0.318 | 0.299 | 0.276 |
| JD    | 0.105 | 0.177  | 0.489 | 0.643 | -     | 0.227 | 0.177 | 0.244 | 0.229 | 0.432 | 0.331 | 0.366 | 0.282 | 0.181  | 0.217 | 0.289 | 0.316 | 0.138 | 0.208 |
| CC    | 0.511 | 0.501  | 0.567 | 0.480 | 0.440 | -     | 0.155 | 0.208 | 0.238 | 0.306 | 0.277 | 0.318 | 0.259 | 0.135  | 0.205 | 0.195 | 0.254 | 0.222 | 0.195 |
| JJ    | 0.248 | 0.349  | 0.442 | 0.567 | 0.183 | 0.334 | -     | 0.127 | 0.229 | 0.310 | 0.258 | 0.252 | 0.213 | 0.162  | 0.149 | 0.154 | 0.184 | 0.231 | 0.149 |
| WJ-I  | 0.532 | 0.414  | 0.406 | 0.541 | 0.274 | 0.390 | 0.096 | -     | 0.229 | 0.351 | 0.287 | 0.252 | 0.274 | 0.224  | 0.199 | 0.195 | 0.236 | 0.200 | 0.204 |
| WJ-II | 0.142 | 0.291  | 0.619 | 0.760 | 0.145 | 0.616 | 0.344 | 0.380 | -     | 0.322 | 0.284 | 0.160 | 0.176 | 0.174  | 0.145 | 0.205 | 0.161 | 0.144 | 0.212 |
| YC    | 0.401 | 0.287  | 0.184 | 0.386 | 0.365 | 0.290 | 0.320 | 0.361 | 0.531 | -     | 0.331 | 0.400 | 0.313 | 0.356  | 0.286 | 0.388 | 0.384 | 0.322 | 0.313 |
| YS    | 0.435 | 0.302  | 0.172 | 0.254 | 0.329 | 0.372 | 0.376 | 0.393 | 0.512 | 0.077 | -     | 0.282 | 0.312 | 0.303  | 0.235 | 0.357 | 0.309 | 0.265 | 0.268 |
| YE    | 0.329 | 0.125  | 0.200 | 0.416 | 0.292 | 0.418 | 0.345 | 0.320 | 0.418 | 0.180 | 0.089 | -     | 0.280 | 0.317  | 0.202 | 0.286 | 0.302 | 0.208 | 0.263 |
| YJ    | 0.198 | -0.028 | 0.434 | 0.607 | 0.197 | 0.446 | 0.288 | 0.363 | 0.349 | 0.255 | 0.244 | 0.159 | -     | 0.162  | 0.122 | 0.269 | 0.191 | 0.116 | 0.238 |
| SE    | 0.224 | 0.341  | 0.372 | 0.516 | 0.259 | 0.362 | 0.223 | 0.299 | 0.483 | 0.202 | 0.111 | 0.336 | 0.334 | -      | 0.173 | 0.206 | 0.238 | 0.168 | 0.214 |
| GC    | 0.278 | 0.218  | 0.429 | 0.528 | 0.157 | 0.379 | 0.241 | 0.331 | 0.326 | 0.274 | 0.212 | 0.187 | 0.101 | -0.040 | -     | 0.117 | 0.027 | 0.092 | 0.176 |
| GY    | 0.241 | 0.286  | 0.345 | 0.513 | 0.293 | 0.306 | 0.046 | 0.155 | 0.480 | 0.175 | 0.263 | 0.265 | 0.253 | 0.120  | 0.081 | -     | 0.172 | 0.155 | 0.210 |
| CY    | 0.543 | 0.420  | 0.310 | 0.355 | 0.474 | 0.453 | 0.464 | 0.446 | 0.614 | 0.309 | 0.100 | 0.137 | 0.440 | 0.256  | 0.200 | 0.376 | -     | 0.144 | 0.207 |
| SC    | 0.220 | 0.312  | 0.585 | 0.705 | 0.080 | 0.521 | 0.271 | 0.349 | 0.180 | 0.480 | 0.427 | 0.390 | 0.275 | 0.259  | 0.142 | 0.372 | 0.478 | -     | 0.170 |
| VL    | 0.433 | 0.478  | 0.456 | 0.593 | 0.460 | 0.357 | 0.196 | 0.350 | 0.574 | 0.349 | 0.458 | 0.485 | 0.440 | 0.431  | 0.383 | 0.139 | 0.581 | 0.527 | -     |

Population pairwise  $F_{ST}$ s: Distance method: Sum of squared size difference ( $R_{ST}$ ) (lower diagonal),  $F_{ST}$  (upper diagonal)

Abbreviations: WJ-I= Wonju (2017), WJ-II= Wonju (2020), YC= Yecheon, YS= Yangsan, AY-I= Anyang (2018), AY-II= Anyang (2020), CC= Chuncheon, CY= Cheongyang, DJ= Daejeon, GC= Gwacheon, GJ= Geoje, GW= Gwangju, GY= Gyeongju, JD= Jeungdo, JJ= Jeonju, SC= Sokcho, SE= Seoul, YJ= Yeosu, YE= Yeosu, TJ= Tokyo, Japan, VL= Vientiane, Laos

**Table S7** Bottleneck test for *Ae. albopictus*.

| Population | M-ratio       | WILCOXON TEST |               |               |
|------------|---------------|---------------|---------------|---------------|
|            |               | I.A.M         | T.P.M         | S.M.M         |
| TJ         | <b>0.5367</b> | <b>0.0005</b> | <b>0.0012</b> | <b>0.0024</b> |
| AY-I       | <b>0.4955</b> | <b>0.0007</b> | <b>0.0034</b> | <b>0.0034</b> |
| DJ         | <b>0.4416</b> | 0.1748        | 0.3203        | 0.5772        |
| GJ         | <b>0.4354</b> | <b>0.0322</b> | 0.3750        | 0.6250        |
| JD         | <b>0.5526</b> | <b>0.0005</b> | <b>0.0010</b> | <b>0.0024</b> |
| CC         | <b>0.4853</b> | <b>0.0137</b> | 0.1055        | 0.3223        |
| JJ         | <b>0.4543</b> | <b>0.0061</b> | <b>0.0342</b> | 0.1763        |
| WJ-I       | <b>0.4804</b> | <b>0.0161</b> | 0.1016        | 0.2402        |
| WJ-II      | <b>0.6648</b> | <b>0.0002</b> | <b>0.0002</b> | <b>0.0002</b> |
| YC         | <b>0.3577</b> | <b>0.0012</b> | <b>0.0012</b> | <b>0.0081</b> |
| YS         | <b>0.3623</b> | <b>0.0031</b> | <b>0.0031</b> | <b>0.0398</b> |
| YE         | <b>0.4847</b> | 0.0840        | 0.0840        | 0.0840        |
| YJ         | <b>0.6673</b> | <b>0.0012</b> | <b>0.0012</b> | <b>0.0012</b> |
| SE         | <b>0.4793</b> | <b>0.0068</b> | <b>0.0122</b> | <b>0.0122</b> |
| GC         | <b>0.5414</b> | <b>0.0024</b> | <b>0.0034</b> | <b>0.0342</b> |
| GY         | <b>0.4614</b> | <b>0.0273</b> | <b>0.0273</b> | <b>0.0273</b> |
| CY         | <b>0.3769</b> | <b>0.0137</b> | <b>0.0137</b> | <b>0.0137</b> |
| SC         | <b>0.6088</b> | <b>0.0024</b> | <b>0.0034</b> | <b>0.0342</b> |
| VL         | <b>0.5569</b> | 0.0479        | 0.0942        | 0.5879        |

IAM: infinite alleles model; SMM: stepwise mutation model; TPM: two phase model

Values in bold indicate a bottleneck (M-ratio  $\leq 0.68$ ; two-tailed Wilcoxon test  $P < 0.05$ ).

Abbreviations: WJ-I= Wonju (2017), WJ-II= Wonju (2020), YC= Yecheon, YS= Yangsan, AY-I= Anyang (2018), AY-II= Anyang (2020), CC= Chuncheon, CY= Cheongyang, DJ= Daejeon, GC= Gwacheon, GJ= Geoje, GW= Gwangju, GY= Gyeongju, JD= Jeungdo, JJ= Jeonju, SC= Sokcho, SE= Seoul, YJ= Yeosu, YE= Yeosu, TJ= Tokyo, Japan, VL= Vientiane, Laos

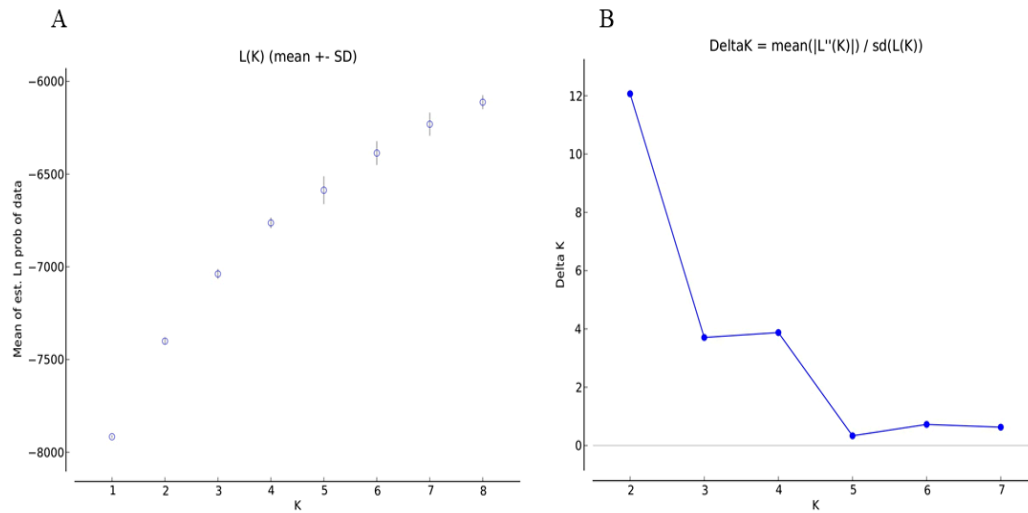

**Figure S1** Estimation of the optimal number of *Aedes albopictus* populations performed using STRUCTURE software. **A** The plot of mean posterior probability ( $\text{Ln } P(D)$ ) was based on ten repeats per cluster,  $K$ -value. **B** Optimal  $K$ -value according to maximum delta  $K$  ( $\Delta K$ )

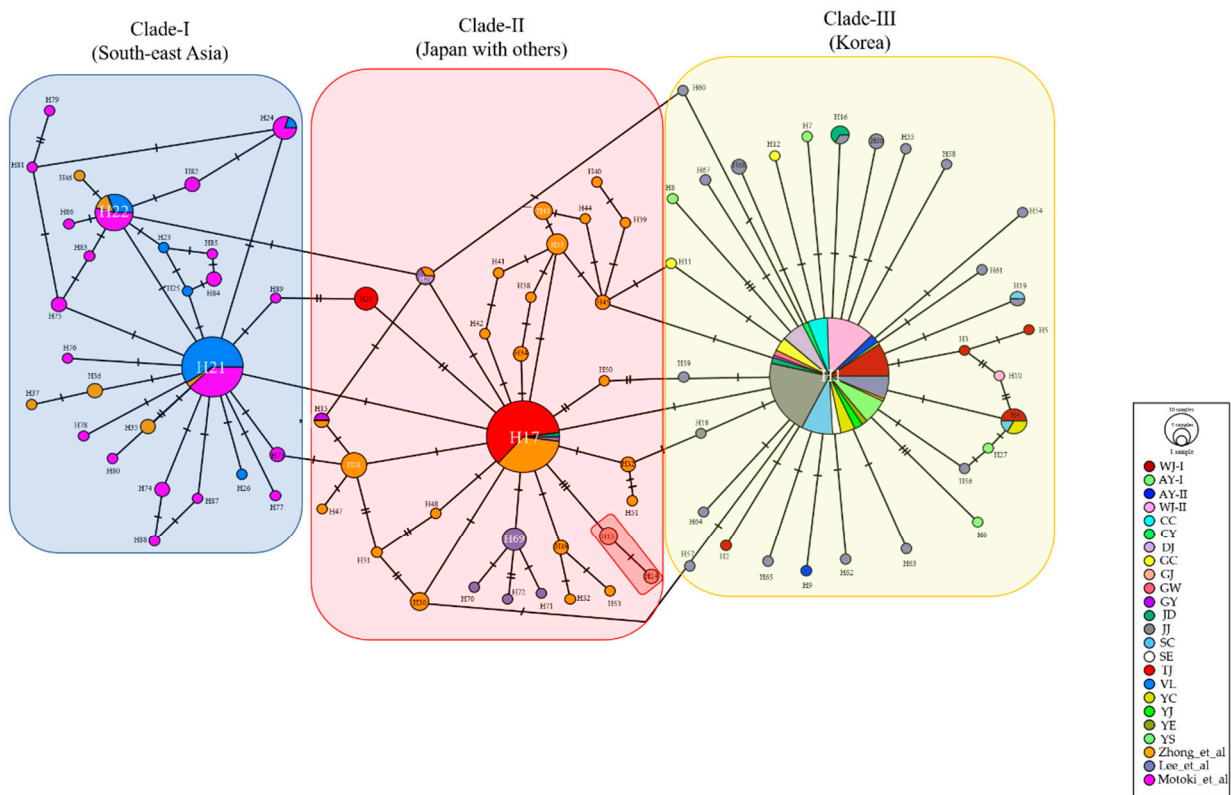

**Figure S2** Minimum spanning network based on the combined NCBI-acquired *COI* sequences and *COI* sequences from this study. It can be seen that the clades clearly distinguish between Korean and South-East Asian countries. The clade is divided into three, and some Korean populations are shared in Clade-II. The table below

shows Korean populations belonging to Clade-II in bold. (Abbreviations: WJ-I= Wonju (2017), WJ-II= Wonju (2020), YC= Yeoncheon, YS= Yangsan, AY-I= Anyang (2018), AY-II= Anyang (2020), CC= Chuncheon, CY= Cheongyang, DJ= Daejeon, GC= Gwacheon, GJ= Geoje, GW= Gwangju, GY= Gyeongju, JD= Jeungdo, JJ= Jeonju, SC= Sokcho, SE= Seoul, YJ= Yeosu, YE= Yeosu, TJ= Tokyo, Japan, VL= Vientiane, Laos).

| Clades   | Haplotype | No. of individuals | Haplotype distribution: Reference/region/regional code (number of populations)                                  |
|----------|-----------|--------------------|-----------------------------------------------------------------------------------------------------------------|
| Clade-I  | H21       | 34                 | Laos; VL (20)<br>Zhong_et_al; Los Angeles County 2001 (1)<br>Motoki_et_al; Laos (13)                            |
|          | H22       | 13                 | Laos; VL (4)<br>Zhong_et_al; Los Angeles County 2001 (2)<br>Motoki_et_al; Laos (7)                              |
|          | H23       | 1                  | Laos; VL (1)                                                                                                    |
|          | H24       | 4                  | Laos; VL (1)<br>Motoki_et_al; Laos (4)                                                                          |
|          | H25       | 1                  | Laos; VL (1)                                                                                                    |
|          | H26       | 1                  | Laos; VL (1)                                                                                                    |
|          | H35       | 2                  | Zhong_et_al; Singapore (2)                                                                                      |
|          | H36       | 2                  | Zhong_et_al; Singapore (2)                                                                                      |
|          | H37       | 1                  | Zhong_et_al; Singapore (1)                                                                                      |
|          | H73       | 2                  | Motoki_et_al; Laos (2)                                                                                          |
|          | H74       | 2                  | Motoki_et_al; Laos (2)                                                                                          |
|          | H75       | 2                  | Motoki_et_al; Laos (2)                                                                                          |
|          | H76       | 1                  | Motoki_et_al; Laos (1)                                                                                          |
|          | H77       | 1                  | Motoki_et_al; Laos (1)                                                                                          |
|          | H78       | 1                  | Motoki_et_al; Laos (1)                                                                                          |
|          | H79       | 1                  | Motoki_et_al; Laos (1)                                                                                          |
|          | H80       | 1                  | Motoki_et_al; Laos (1)                                                                                          |
|          | H81       | 1                  | Motoki_et_al; Laos (1)                                                                                          |
|          | H82       | 2                  | Motoki_et_al; Laos (2)                                                                                          |
|          | H83       | 1                  | Motoki_et_al; Laos (1)                                                                                          |
|          | H84       | 2                  | Motoki_et_al; Laos (2)                                                                                          |
|          | H85       | 1                  | Motoki_et_al; Laos (1)                                                                                          |
|          | H86       | 1                  | Motoki_et_al; Laos (1)                                                                                          |
|          | H87       | 1                  | Motoki_et_al; Laos (1)                                                                                          |
|          | H88       | 1                  | Motoki_et_al; Laos (1)                                                                                          |
|          | H89       | 1                  | Motoki_et_al; Laos (1)                                                                                          |
| Clade-II | H13       | 3                  | <b>Korea; GJ (3)</b>                                                                                            |
|          | H14       | 2                  | <b>Korea; GJ (2)</b>                                                                                            |
|          | H15       | 2                  | <b>Korea; GY (1)</b><br>Zhong_et_al; China (1)                                                                  |
|          | H17       | 49                 | <b>Korea; JD (1)</b><br>Japan; TJ (30)<br>Zhong_et_al; contains mainly China (1)<br><b>Lee_et_al; Korea (1)</b> |
|          | H20       | 5                  | Japan; TJ (5)                                                                                                   |
|          | H28       | 6                  | Zhong_et_al; contains mainly Los Angeles County 2001 (6)                                                        |
|          | H29       | 3                  | Zhong_et_al; China (1)<br><b>Lee_et_al; Korea (2)</b>                                                           |
|          | H30       | 3                  | Zhong_et_al; China (1), Taiwan (2)                                                                              |
|          | H31       | 1                  | Zhong_et_al; China (1)                                                                                          |
|          | H32       | 2                  | Zhong_et_al; China (1), Taiwan (1)                                                                              |
|          | H33       | 4                  | Zhong_et_al; China (1), Italy (2), New Jersey (1)                                                               |
|          | H34       | 2                  | Zhong_et_al; contains mainly Singapore (2)                                                                      |
|          | H38       | 1                  | Zhong_et_al; Singapore (1)                                                                                      |
|          | H39       | 1                  | Zhong_et_al; Singapore (1)                                                                                      |
|          | H40       | 1                  | Zhong_et_al; Singapore (1)                                                                                      |
|          | H41       | 1                  | Zhong_et_al; Italy (1)                                                                                          |

|           |     |     |                                                                                                                                                                                                                               |
|-----------|-----|-----|-------------------------------------------------------------------------------------------------------------------------------------------------------------------------------------------------------------------------------|
|           | H42 | 1   | Zhong_et_al; contains mainly Texas (1)                                                                                                                                                                                        |
|           | H43 | 3   | Zhong_et_al; Italy (1), New Jersey (2)                                                                                                                                                                                        |
|           | H44 | 1   | Zhong_et_al; Italy (1)                                                                                                                                                                                                        |
|           | H45 | 2   | Zhong_et_al; Italy (1), New Jersey (1)                                                                                                                                                                                        |
|           | H46 | 1   | Zhong_et_al; Los Angeles County 2001 (1)                                                                                                                                                                                      |
|           | H47 | 1   | Zhong_et_al; Los Angeles County 2011 (1)                                                                                                                                                                                      |
|           | H48 | 1   | Zhong_et_al; Texas (1)                                                                                                                                                                                                        |
|           | H49 | 2   | Zhong_et_al; Hawai'I (2)                                                                                                                                                                                                      |
|           | H50 | 1   | Zhong_et_al; Hawai'I (1)                                                                                                                                                                                                      |
|           | H51 | 1   | Zhong_et_al; Hawai'I (1)                                                                                                                                                                                                      |
|           | H52 | 1   | Zhong_et_al; Hawai'I (1)                                                                                                                                                                                                      |
|           | H53 | 1   | Zhong_et_al; Hawai'I (1)                                                                                                                                                                                                      |
|           | H69 | 5   | <b>Lee_et_al; Korea (5)</b>                                                                                                                                                                                                   |
|           | H70 | 1   | <b>Lee_et_al; Korea (1)</b>                                                                                                                                                                                                   |
|           | H71 | 1   | <b>Lee_et_al; Korea (1)</b>                                                                                                                                                                                                   |
|           | H72 | 1   | <b>Lee_et_al; Korea (1)</b>                                                                                                                                                                                                   |
| Clade-III | H1  | 129 | Korea;<br>WJ-I (12), WJ-II (17), AY-I (1), AY-II (3), CC (7), CY (2), DJ (8), GC (5),<br>GW (2), GY (1), JD (2), JJ (22) SC (11), SE (3), YC (5), YJ (3), YE (2), YS<br>(9)<br>Zhong_et_al; Japan (1)<br>Lee_et_al; Korea (8) |
|           | H2  | 1   | Korea; WJ-I (1)                                                                                                                                                                                                               |
|           | H3  | 1   | Korea; WJ-I (1)                                                                                                                                                                                                               |
|           | H4  | 6   | Korea; WJ-I (3), SC (1), YS (2)                                                                                                                                                                                               |
|           | H5  | 1   | Korea; WJ-I (1)                                                                                                                                                                                                               |
|           | H6  | 1   | Korea; AY-I (1)                                                                                                                                                                                                               |
|           | H7  | 1   | Korea; AY-I (1)                                                                                                                                                                                                               |
|           | H8  | 1   | Korea; AY-I (1)                                                                                                                                                                                                               |
|           | H9  | 1   | Korea; AY-II (1)                                                                                                                                                                                                              |
|           | H10 | 1   | Korea; WJ-II (1)                                                                                                                                                                                                              |
|           | H11 | 1   | Korea; GC (1)                                                                                                                                                                                                                 |
|           | H12 | 1   | Korea; GC (1)                                                                                                                                                                                                                 |
|           | H16 | 3   | Korea; JD (1)<br>Lee_et_al; Korea (1),                                                                                                                                                                                        |
|           | H18 | 1   | Korea; JJ (1)                                                                                                                                                                                                                 |
|           | H19 | 2   | Korea; SC (1)<br>Lee_et_al; Korea (1)                                                                                                                                                                                         |
|           | H27 | 1   | Korea; YS (1)                                                                                                                                                                                                                 |
|           | H54 | 1   | Lee_et_al; Korea (1)                                                                                                                                                                                                          |
|           | H55 | 1   | Lee_et_al; Korea (1)                                                                                                                                                                                                          |
|           | H56 | 1   | Lee_et_al; Korea (1)                                                                                                                                                                                                          |
|           | H57 | 1   | Lee_et_al; Korea (1)                                                                                                                                                                                                          |
|           | H58 | 1   | Lee_et_al; Korea (1)                                                                                                                                                                                                          |
|           | H59 | 1   | Lee_et_al; Korea (1)                                                                                                                                                                                                          |
|           | H60 | 1   | Lee_et_al; Korea (1)                                                                                                                                                                                                          |
|           | H61 | 1   | Lee_et_al; Korea (1)                                                                                                                                                                                                          |
|           | H62 | 1   | Lee_et_al; Korea (1)                                                                                                                                                                                                          |
|           | H63 | 1   | Lee_et_al; Korea (1)                                                                                                                                                                                                          |
|           | H64 | 1   | Lee_et_al; Korea (1)                                                                                                                                                                                                          |
|           | H65 | 1   | Lee_et_al; Korea (1)                                                                                                                                                                                                          |
|           | H66 | 2   | Lee_et_al; Korea (2)                                                                                                                                                                                                          |
|           | H67 | 1   | Lee_et_al; Korea (1)                                                                                                                                                                                                          |
|           | H68 | 2   | Lee_et_al; Korea (2)                                                                                                                                                                                                          |



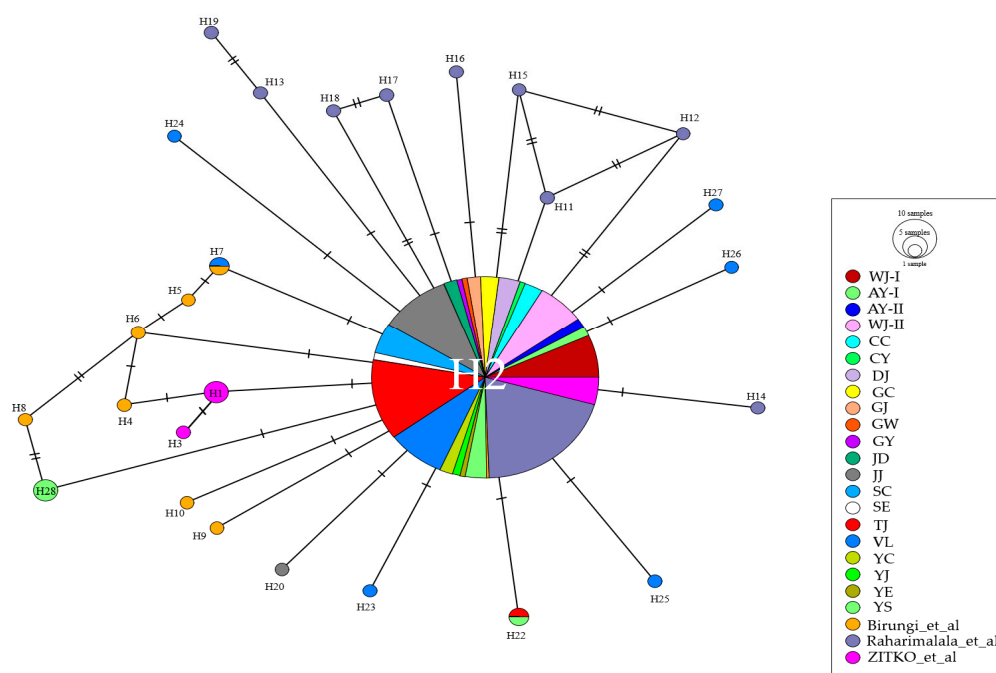

**Figure S3** Minimum spanning network based on the combined NCBI-acquired *ND5* sequences and *ND5* sequences from this study. The *ND5* haplotype results shared haplotypes overall without the clear distinction from each studied country (Laos, Japan, and Korea). The table below shows the haplotype distributing to the different localities (Abbreviations: WJ-I= Wonju (2017), WJ-II= Wonju (2020), YC= Yeoncheon, YS= Yangsan, AY-I= Anyang (2018), AY-II= Anyang (2020), CC= Chuncheon, CY= Cheongyang, DJ= Daejeon, GC= Gwacheon, GJ= Geoje, GW= Gwangju, GY= Gyeongju, JD= Jeungdo, JJ= Jeonju, SC= Sokcho, SE= Seoul, YJ= Yeosu, YE= Yeosu, TJ= Tokyo, Japan, VL= Vientiane, Laos).

| Haplotype | No. of individuals | Haplotype distribution: Reference/region/regional code (number of populations)                                                                                                                                                                                                                                                                                        |
|-----------|--------------------|-----------------------------------------------------------------------------------------------------------------------------------------------------------------------------------------------------------------------------------------------------------------------------------------------------------------------------------------------------------------------|
| H1        | 3                  | ZITKO_et_al; Brazil (2)<br>Birungi_et_al; Brazil (1)                                                                                                                                                                                                                                                                                                                  |
| H2        | 262                | Korea;<br>WJ-I (18), WJ-II (18), AY-I (4), AY-II (4), CC (7), CY (2), DJ (8), GC (7), GJ (5), GW (2), GY (2), JD (5), JJ (27) SC (13), SE (2), YC (5), YJ (3), YE (2), YS (8)<br>ZITKO_et_al; Viet Nam (2), USA (1), Cambodia (1), Madagascar (1), France (2), Hawai'I (1), Reunion (2)<br>Birungi_et_al; USA (1)<br>Raharimalala_et_al; Reunion (1), Madagascar (52) |
| H3        | 1                  | ZITKO_et_al;                                                                                                                                                                                                                                                                                                                                                          |
| H4        | 1                  | Birungi_et_al;                                                                                                                                                                                                                                                                                                                                                        |
| H5        | 1                  | Birungi_et_al;                                                                                                                                                                                                                                                                                                                                                        |
| H6        | 1                  | Birungi_et_al;                                                                                                                                                                                                                                                                                                                                                        |
| H7        | 1                  | Birungi_et_al;                                                                                                                                                                                                                                                                                                                                                        |
| H8        | 1                  | Birungi_et_al;                                                                                                                                                                                                                                                                                                                                                        |
| H9        | 1                  | Birungi_et_al;                                                                                                                                                                                                                                                                                                                                                        |
| H10       | 1                  | Birungi_et_al;                                                                                                                                                                                                                                                                                                                                                        |
| H11       | 1                  | Raharimalala_et_al;                                                                                                                                                                                                                                                                                                                                                   |
| H12       | 1                  | Raharimalala_et_al;                                                                                                                                                                                                                                                                                                                                                   |
| H13       | 1                  | Raharimalala_et_al;                                                                                                                                                                                                                                                                                                                                                   |
| H14       | 1                  | Raharimalala_et_al;                                                                                                                                                                                                                                                                                                                                                   |
| H15       | 1                  | Raharimalala_et_al;                                                                                                                                                                                                                                                                                                                                                   |
| H16       | 1                  | Raharimalala_et_al;                                                                                                                                                                                                                                                                                                                                                   |
| H17       | 1                  | Raharimalala_et_al;                                                                                                                                                                                                                                                                                                                                                   |
| H18       | 1                  | Raharimalala_et_al;                                                                                                                                                                                                                                                                                                                                                   |
| H19       | 1                  | Raharimalala_et_al;                                                                                                                                                                                                                                                                                                                                                   |

---

|     |   |                                |
|-----|---|--------------------------------|
| H20 | 1 | Korea; JJ (1)                  |
| H21 | 1 | Korea; SE (1)                  |
| H22 | 2 | Korea; YS (1)<br>Japan; TJ (1) |
| H23 | 1 | Laos; VL (1)                   |
| H24 | 1 | Laos; VL (1)                   |
| H25 | 1 | Laos; VL (1)                   |
| H26 | 1 | Laos; VL (1)                   |
| H27 | 1 | Laos; VL (1)                   |
| H28 | 1 | Korea; YS (3)                  |

---
